# Supplementary material for: A perylene diimide-based nanoring architecture for exogenous and endogenous ATP detection: biochemical assay for monitoring phosphorylation of glucose
Source: Royal Society of Chemistry journal article supplement (doi:10.1039/d1tb02235k), 2021-11-24
Supplement: d1tb02235k1.pdf [file d1tb02235k1.pdf]

## Supporting Information

*for*

### **Perylene diimide-based nanoring architecture for exogenous and endogenous ATP detection: Biochemical assay for monitoring phosphorylation of glucose**

Prabhpreet Singh<sup>\*a</sup>, Poonam Sharma<sup>a</sup>, Neha Sharma<sup>b</sup> and Satwinderjeet Kaur<sup>b</sup>

<sup>a</sup>Department of Chemistry, UGC Centre for Advanced Studies II, Guru Nanak Dev University, Amritsar 143 005, India. Tel: +91-84271-01534

<sup>b</sup>Department of Botanical and Environmental Sciences, Guru Nanak Dev University, Amritsar 143 005, India.

Email: [prabhpreet.chem@gndu.ac.in](mailto:prabhpreet.chem@gndu.ac.in)

#### Synthesis of tyrosine-based alkyl amide (**1**)

To the solution of Boc-L-tyrosine (500 mg, 1.77 mmol) in a minimum quantity of DMF, N,N'-diisopropylethylamine (DIEA) (310  $\mu$ L, 1.77 mmol) was added. Subsequently, 1-Ethyl-3-(3'-dimethylaminopropyl) carbodiimide hydrochloride (EDC.HCl) (375 mg, 1.95 mmol) and hydroxybenzotriazole (HOBt) (264 mg, 1.95 mmol) were slowly added to the reaction mixture. After a time interval of 15 minutes, *tert*-butyl (4-aminobutyl)carbamate (334 mg, 1.77 mmol) was added to the reaction mixture and stirring continued for another 4h. The progress of the reaction was checked by *tlc*. After completion of the reaction, the DMF was removed on a rotary evaporator and residue was extracted with water and ethyl acetate. The ethyl acetate part was dried over Na<sub>2</sub>SO<sub>4</sub> and then concentrated under vacuum. The crude product was purified by column chromatography (neutralized SiO<sub>2</sub>, 3: 97, EtOAc: CHCl<sub>3</sub>, v/v) to isolate pure compound **1**, solid, R<sub>f</sub> = 0.45; yield = 56%; <sup>1</sup>H NMR (500 MHz, CDCl<sub>3</sub>, 25°C);  $\delta$  7.56 (bs, 1H, -OH), 7.05 (d, *J* = 7.5 Hz, 2H), 6.80 (d, *J* = 8.0 Hz, 2H), 5.99 (bs, 1H, -NH), 5.31 (bs, 1H, -NH), 4.79 (bs, 1H, -NH), 4.22 (bt, 1H, tyrosine -CH), 2.86–3.24 (m, tyrosine -CH<sub>2</sub> and -CH<sub>2</sub> of butyl chain, 6H), 1.47 (s, 9H), 1.44 (s, 9H), 1.34–1.21 (m, 4H); <sup>13</sup>C NMR (125 MHz, CDCl<sub>3</sub>, 25°C)  $\delta$  171.40, 156.41, 155.55, 155.48, 130.37, 128.00, 115.90, 80.20, 79.74, 56.51, 40.22, 39.00, 38.28, 28.47, 28.33, 27.63, 26.51; IR spectrum (ATR):  $\nu_{\max}$  [cm<sup>-1</sup>] = 3339.7, 2937.1, 1759, 1684.8, 1513.3, 1364.2, 1237.5, 1162.9 cm<sup>-1</sup>.

## 1. Experimental Section

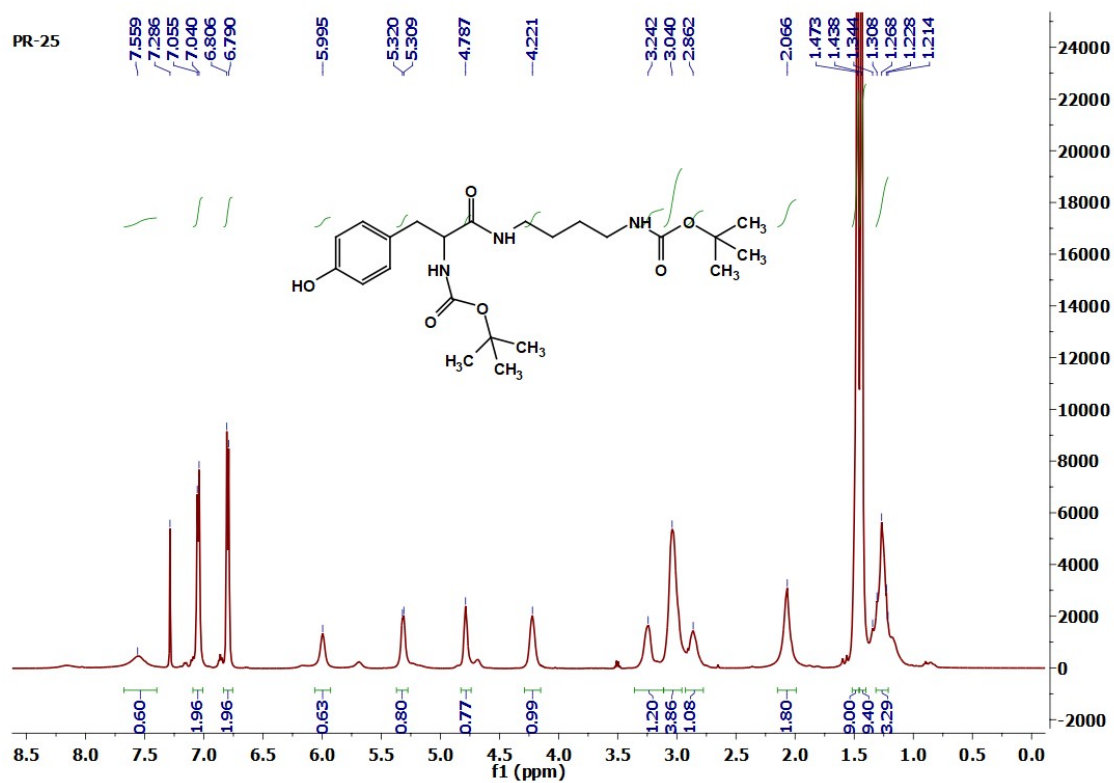

Figure S1a: <sup>1</sup>H NMR spectrum of Compound 1 in CDCl<sub>3</sub>.

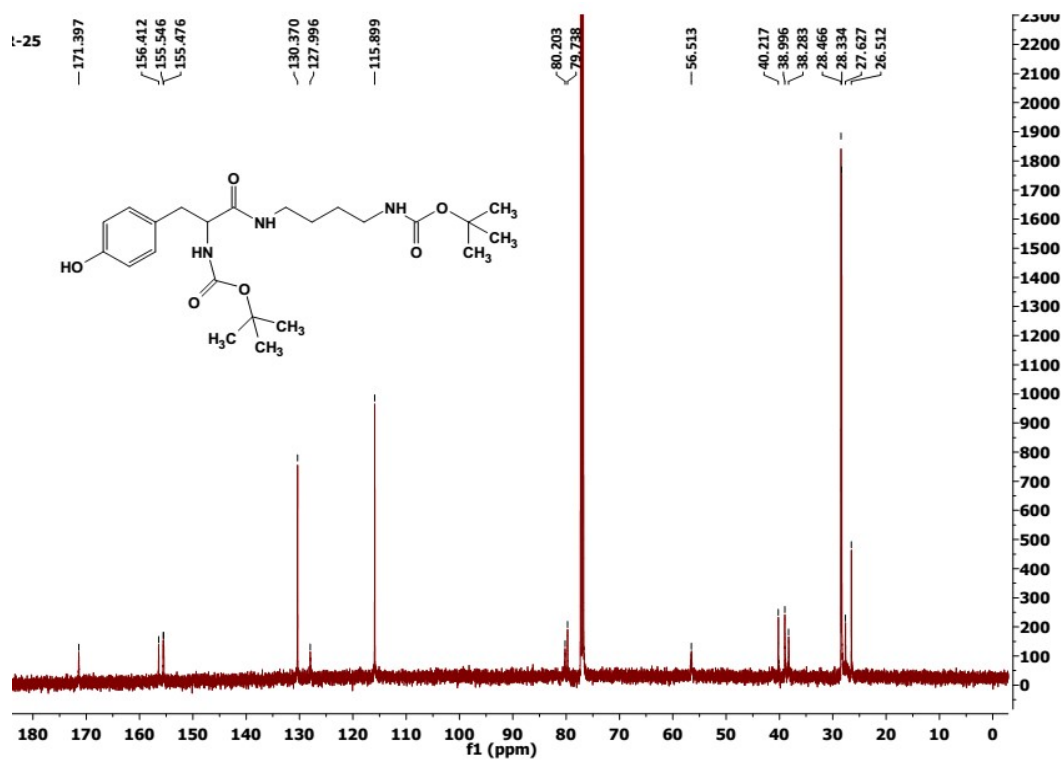

Figure S1b: <sup>13</sup>C NMR spectrum of Compound 1 in CDCl<sub>3</sub>.

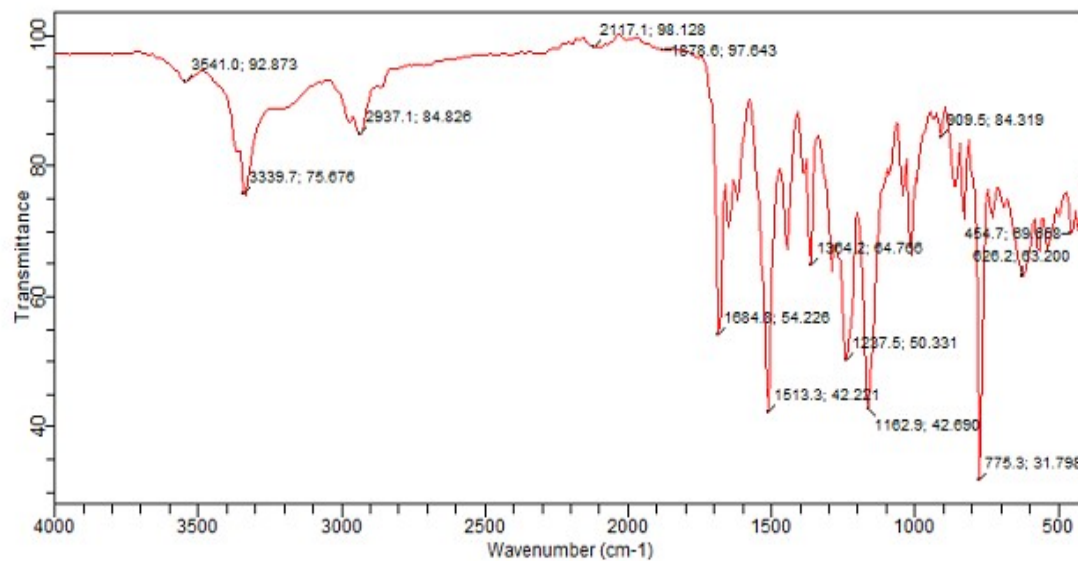

Figure S1c: FTIR (ATR) spectrum of Compound 1.

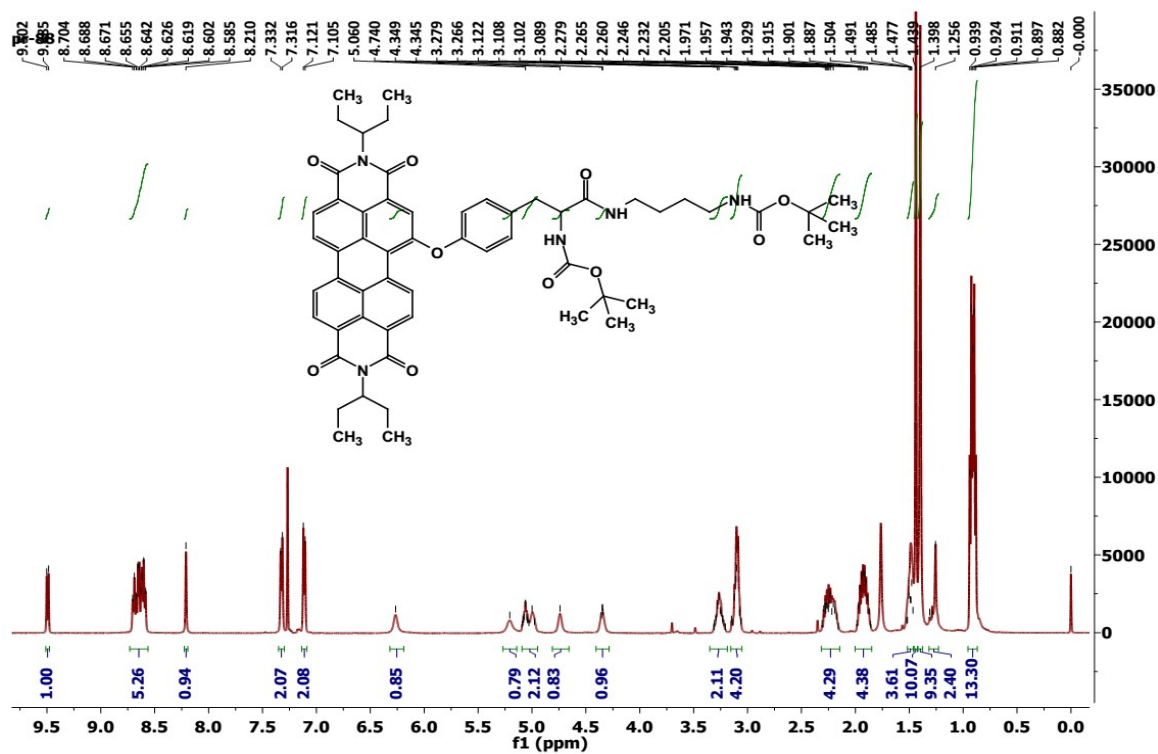

Figure S2a:  $^1\text{H}$  NMR spectrum of PDI 2 in  $\text{CDCl}_3$ .

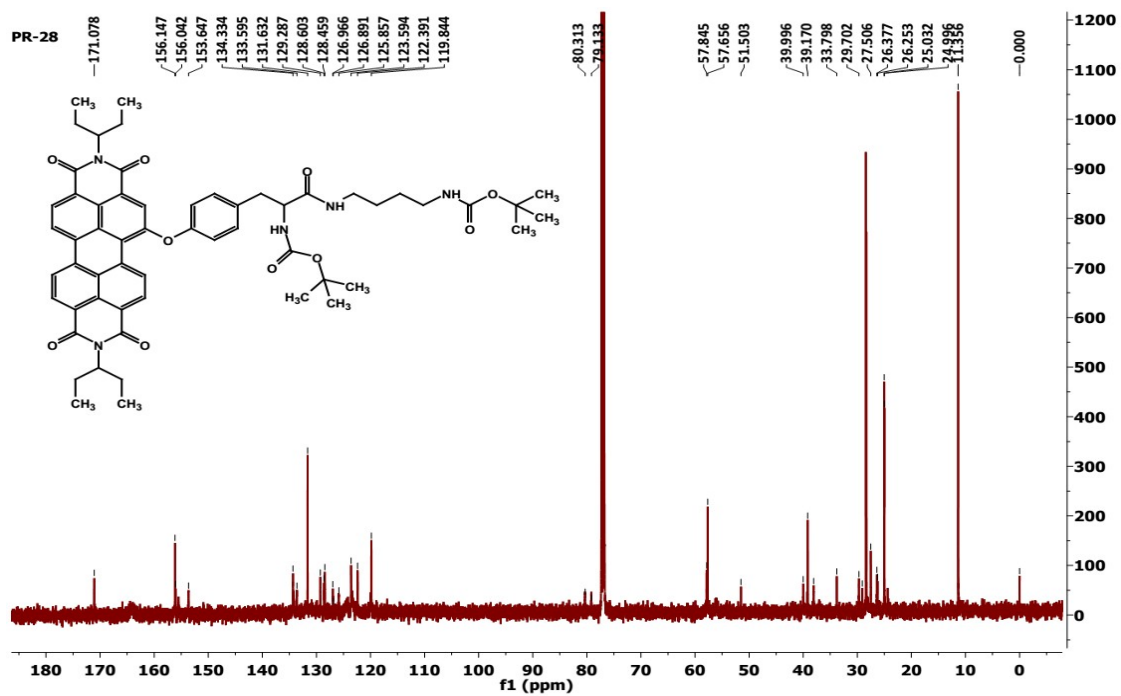

Figure S2b:  $^{13}\text{C}$  NMR spectrum of PDI **2** in  $\text{CDCl}_3$ .

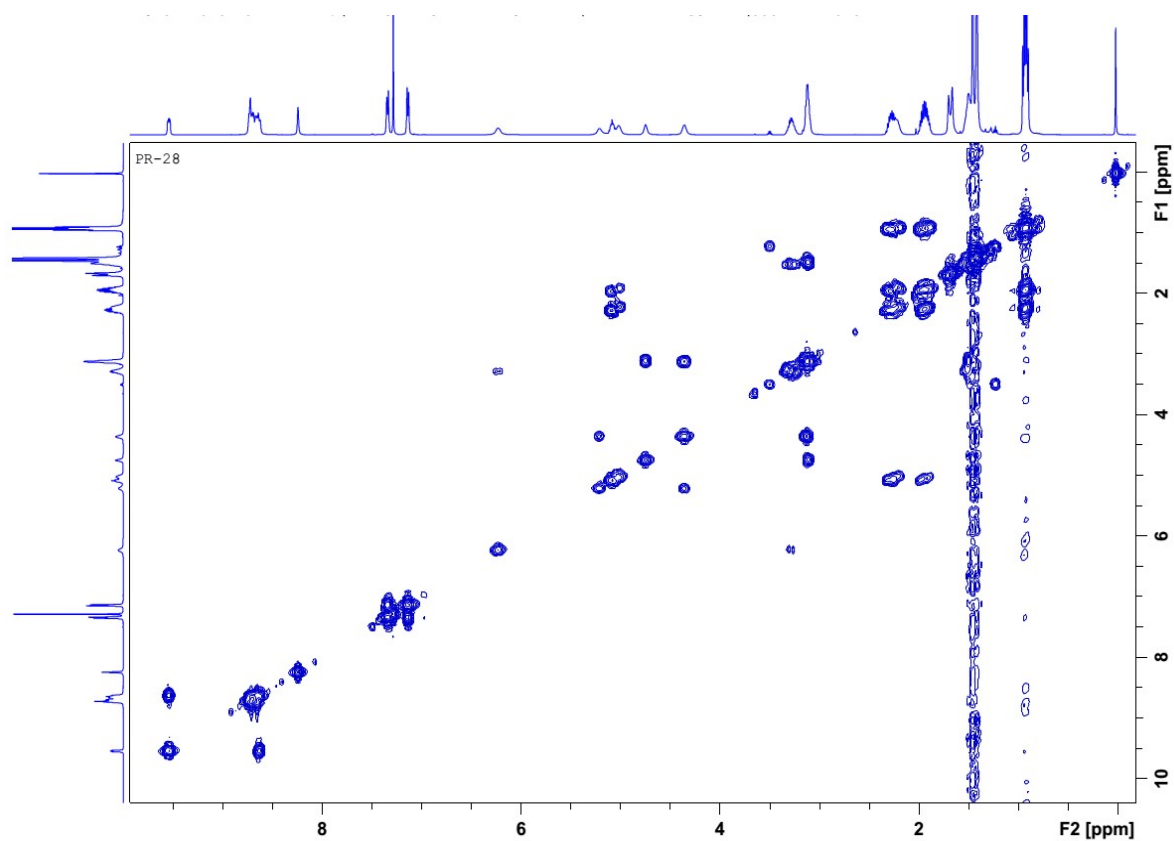

Figure S2c:  $^1\text{H}$ - $^1\text{H}$  COSEY NMR spectrum of PDI **2** in  $\text{CDCl}_3$ .

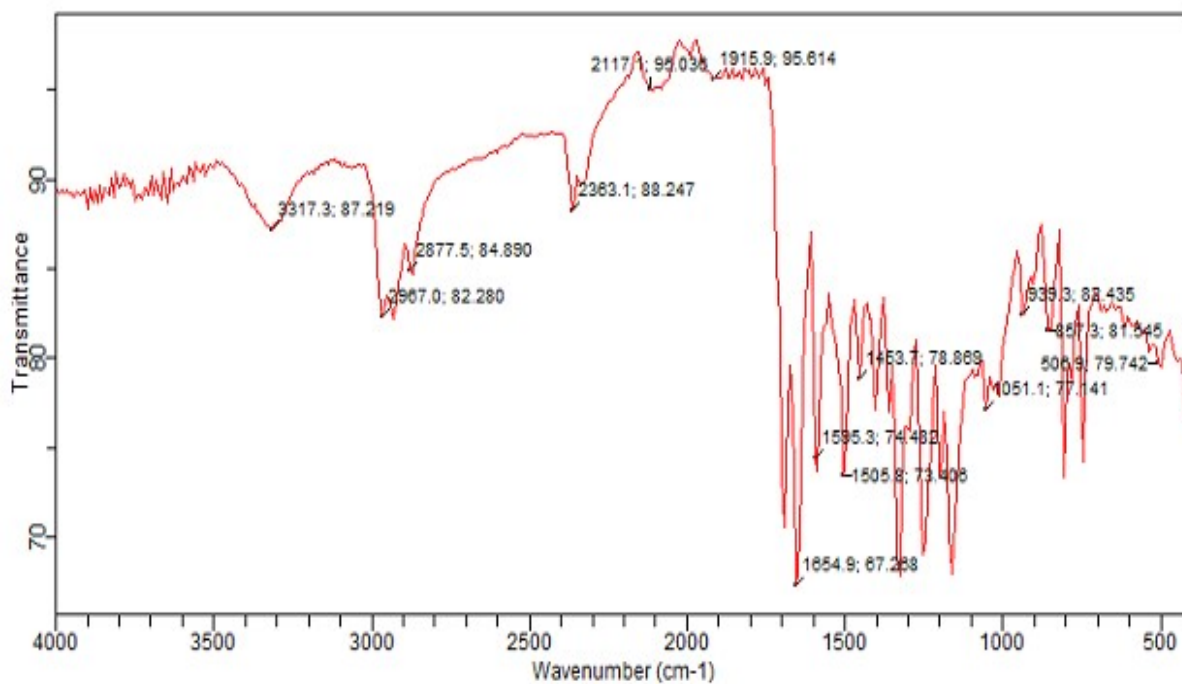

Figure S2d: FTIR spectrum of PDI 2.

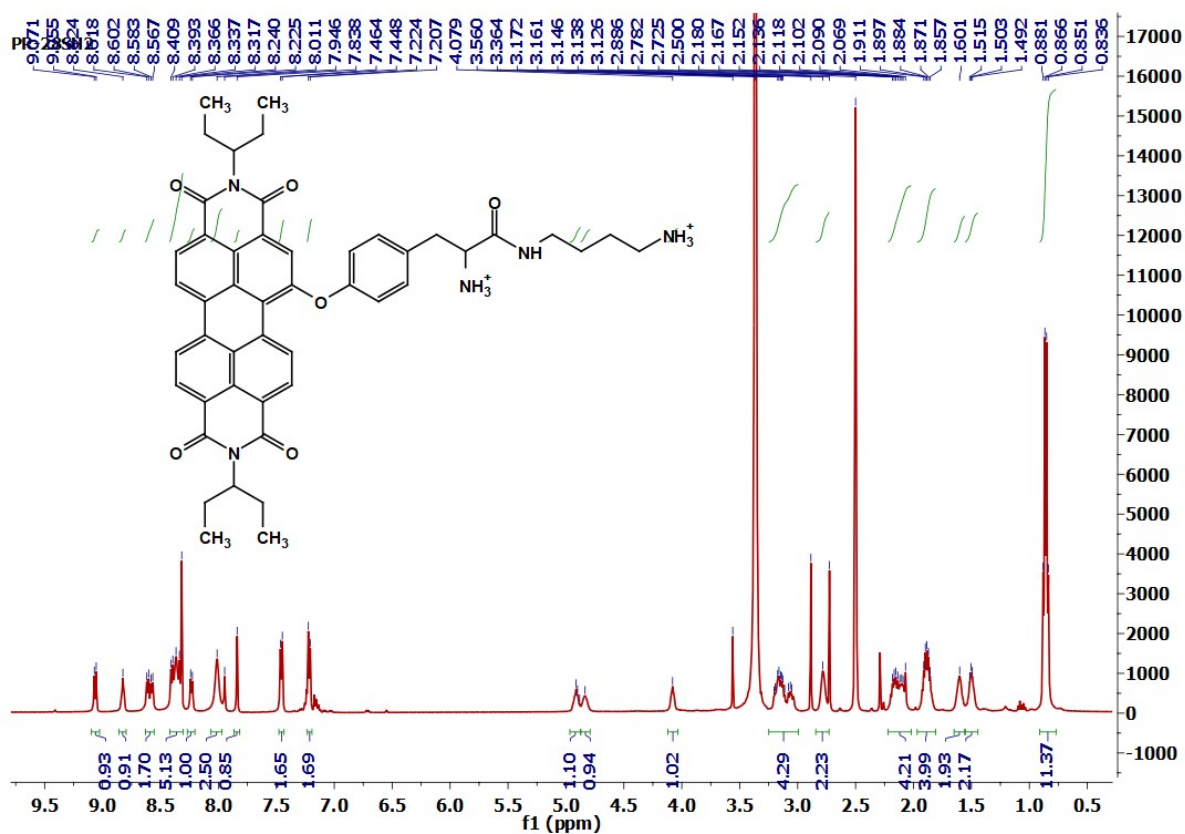

Figure S3a: <sup>1</sup>H NMR spectrum of PDI 3 in DMSO-*d*<sub>6</sub>.

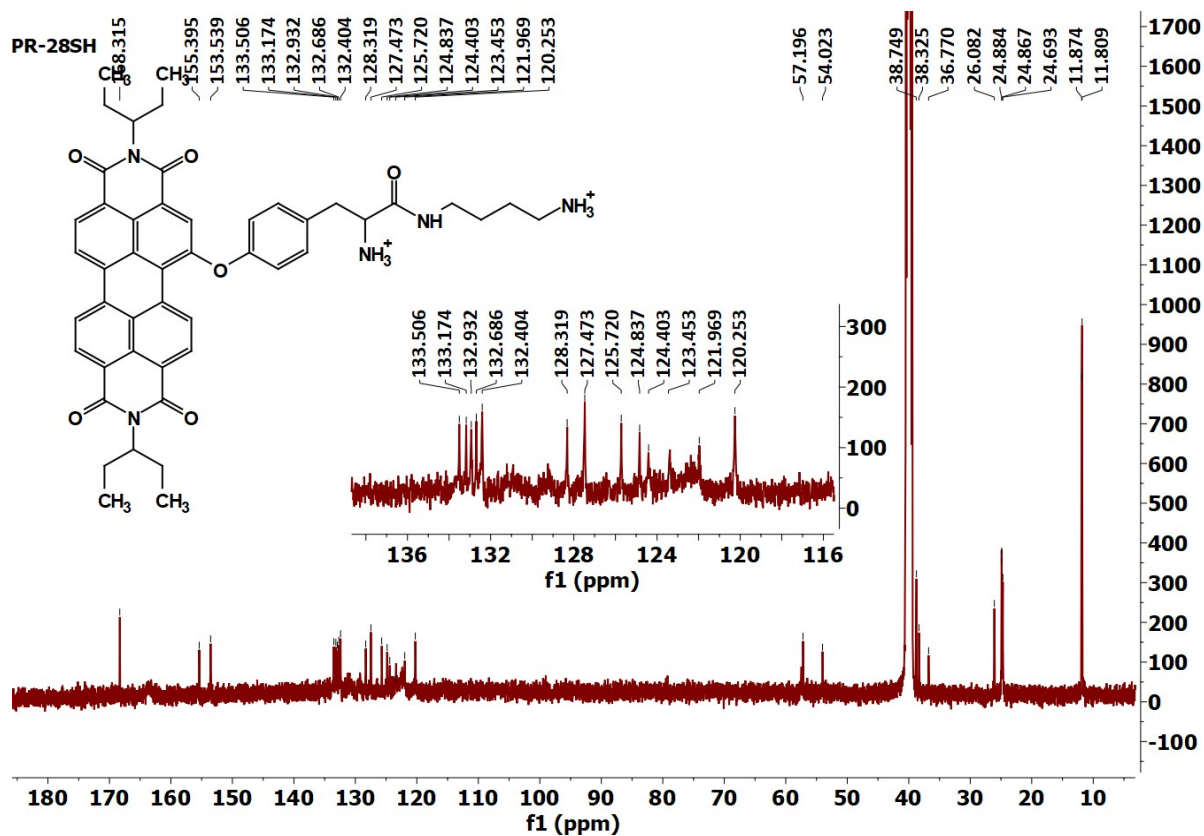

Figure S3b:  $^{13}\text{C}$  NMR spectrum of PDI 3 in  $\text{DMSO-}d_6$ .

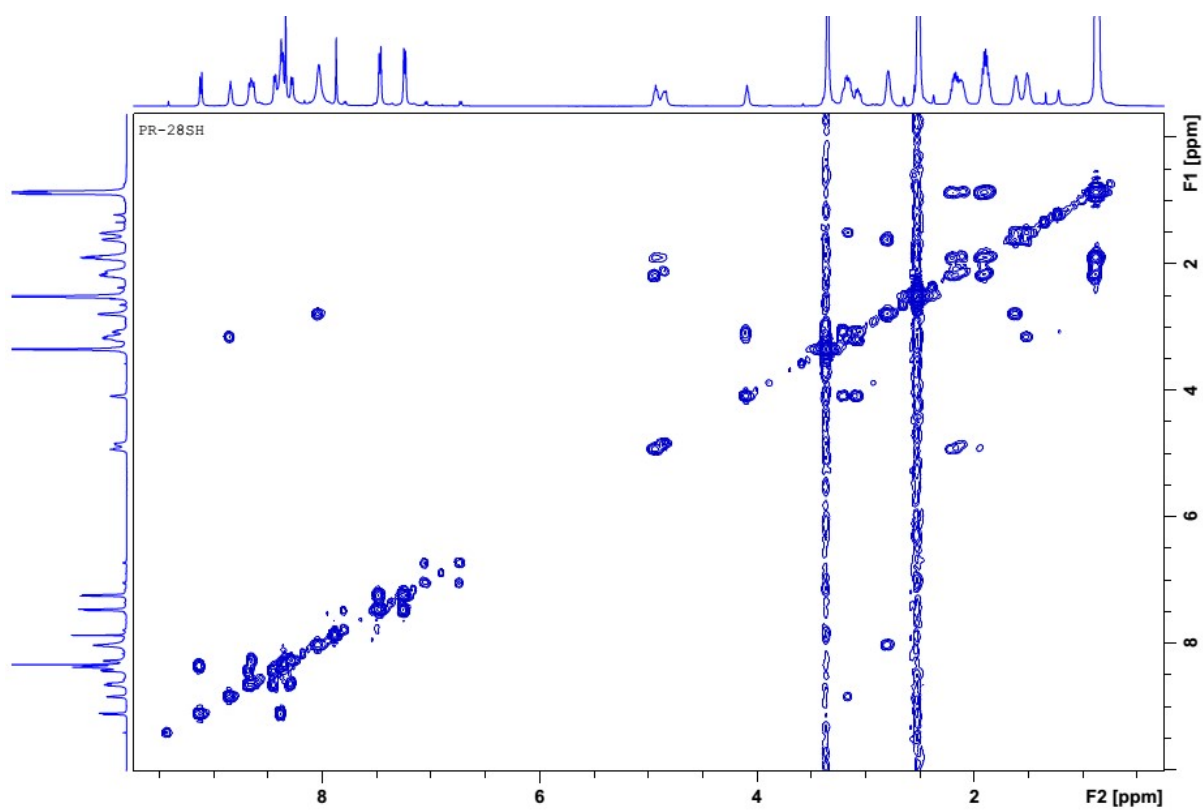

Figure S3c:  $^1\text{H-}^1\text{H}$  COY NMR spectrum of PDI 3 in  $\text{DMSO-}d_6$ .



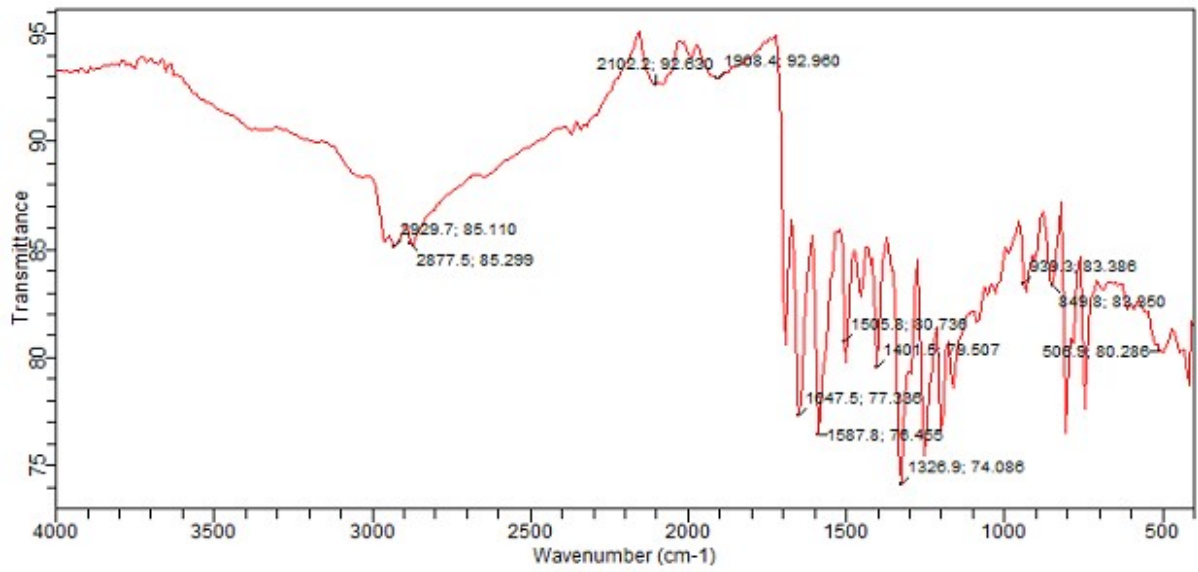

**Figure S3d:** FTIR spectrum of PDI 3.

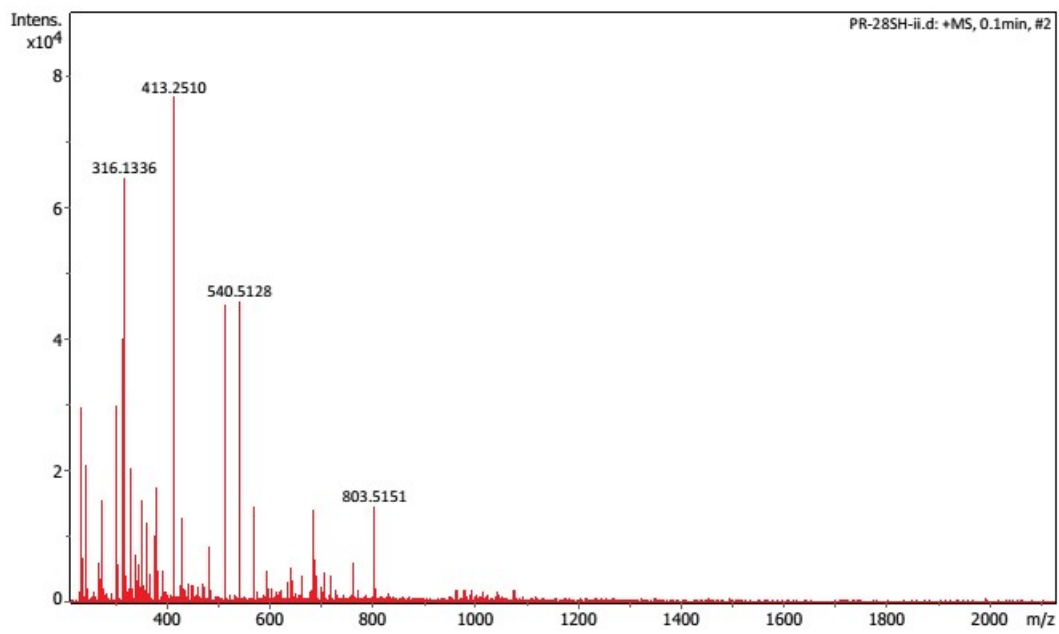

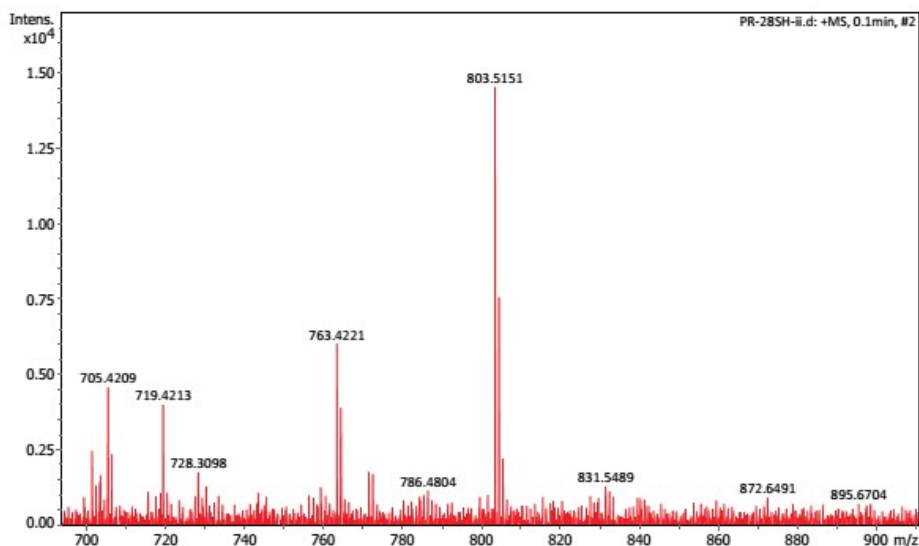

**Figure S3e:** Mass spectrum (Full and zoomed view) of PDI 3.

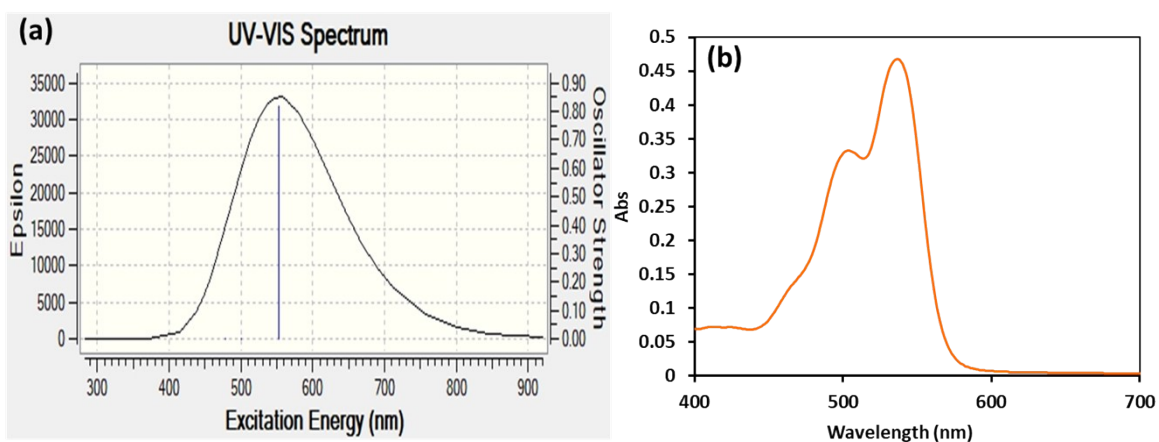

**Figure S4a:** (a) TD-DFT spectrum of PDI 3; (b) experimentally determined UV-Vis spectrum of PDI 3.

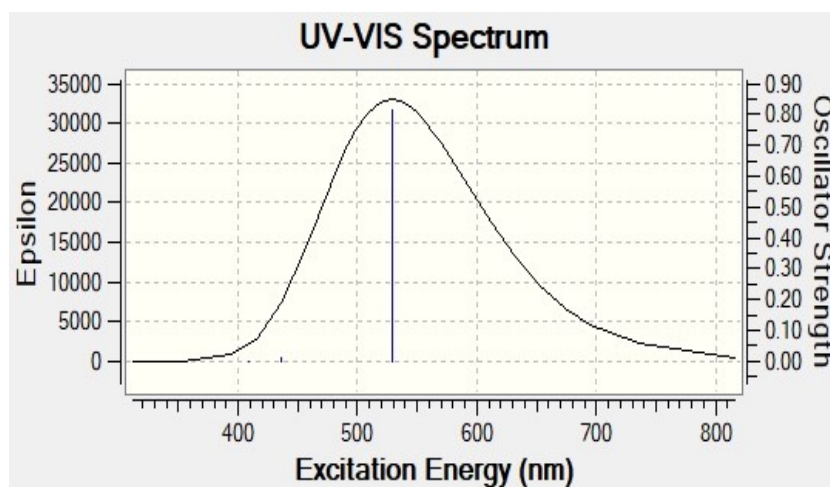

**Figure S4b:** TD-DFT spectrum of PDI 2.



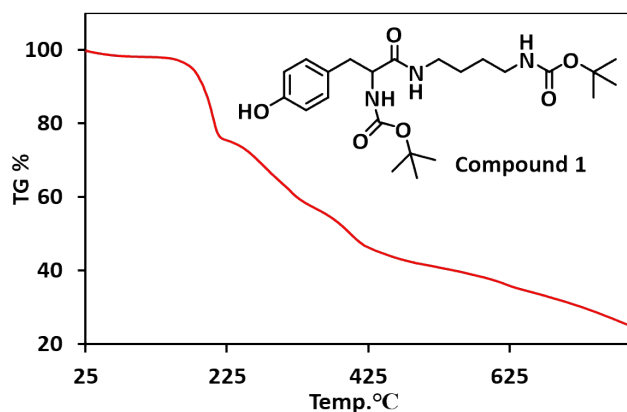

Figure S5: TGA data of compound 1.

#### Anton Paar Polarimeter - Measurement(s)

MCP 150  
Software Version: 1.50.4074.82  
Serial Number: 82104498

##### Unique Id 413

▶ Sample Name:  
▶ Date:  
▶ Username:  
▶ Sample State:

#### Compound 1 (CHCl<sub>3</sub>)

03/12/2020 - 05:00 PM  
Administrator  
Ok

▶ Measurement Mode: Specific Rotation  
▶ Measurement Result: +5.000 °  
▶ Concentration: +0.400 g/100ml  
▶ Optical Rotation: +0.002 °  
▶ Set Temperature: +25.0 °C  
▶ Temperature: +25.0 °C

#### Anton Paar Polarimeter - Measurement(s)

MCP 150  
Software Version: 1.50.4074.82  
Serial Number: 82104498

##### Unique Id 539

▶ Sample Name:  
▶ Date:  
▶ Username:  
▶ Sample State:

#### PDI 2 (CHCl<sub>3</sub>)

10/31/2020 - 11:36 AM  
Administrator  
Ok

▶ Measurement Mode: Specific Rotation  
▶ Measurement Result: +27.500 °  
▶ Concentration: +0.400 g/100ml  
▶ Optical Rotation: +0.011 °  
▶ Set Temperature: +25.0 °C  
▶ Temperature: +25.0 °C

#### Anton Paar Polarimeter - Measurement(s)

MCP 150  
Software Version: 1.50.4074.82  
Serial Number: 82104498

##### Unique Id 544

▶ Sample Name:  
▶ Date:  
▶ Username:  
▶ Sample State:

#### PDI 3 (CHCl<sub>3</sub>)

10/31/2020 - 12:04 PM  
Administrator  
Ok

▶ Measurement Mode: Specific Rotation  
▶ Measurement Result: +25.000 °  
▶ Concentration: +0.400 g/100ml  
▶ Optical Rotation: +0.010 °  
▶ Set Temperature: +25.0 °C  
▶ Temperature: +25.0 °C

Anton Paar Polarimeter - Measurement(s)    Anton Paar Polarimeter - Measurement(s)  
 MCP 150    MCP 150  
 Software Version: 1.50.4074.82    Software Version: 1.50.4074.82  
 Serial Number: 82104498    Serial Number: 82104498

**Unique Id 642**

▶ Sample Name: **PDI 3 (DMSO)**  
 ▶ Date: 07/17/2021 - 01:34 PM  
 ▶ Username: Administrator  
 ▶ Sample State: Ok

▶ Measurement Mode: Specific Rotation  
 ▶ Measurement Result: +20.000 °  
 ▶ Concentration: +0.100 g/100ml  
 ▶ Optical Rotation: +0.002 °  
 ▶ Set Temperature: +25.0 °C  
 ▶ Temperature: +25.0 °C  
 ▶ Wavelength in air: +589.28 nm  
 ▶ Wavelength in vacuum: +589.44 nm  
 ▶ Cell Length: +10.00 mm

**Unique Id 640**

▶ Sample Name: **ATP Complex(DMSO)**  
 ▶ Date: 07/17/2021 - 01:15 PM  
 ▶ Username: Administrator  
 ▶ Sample State: Ok

▶ Measurement Mode: Specific Rotation  
 ▶ Measurement Result: -80.000 °  
 ▶ Concentration: +0.100 g/100ml  
 ▶ Optical Rotation: -0.008 °  
 ▶ Set Temperature: +25.0 °C  
 ▶ Temperature: +25.0 °C  
 ▶ Wavelength in air: +589.28 nm  
 ▶ Wavelength in vacuum: +589.44 nm  
 ▶ Cell Length: +10.00 mm

**Figure S6:** Specific optical rotations of all synthesized derivatives.

Table for Specific optical rotation values

| Compound   | Solvent           | Optical Rotation | Concentration  | Specific Rotation |
|------------|-------------------|------------------|----------------|-------------------|
| Compound 1 | CHCl <sub>3</sub> | +0.002°          | +0.400 g/100ml | +5.000°           |
| PDI 2      | CHCl <sub>3</sub> | +0.011°          | +0.400 g/100ml | +27.500°          |
| PDI 3      | CHCl <sub>3</sub> | +0.010°          | +0.400 g/100ml | +25.000°          |

Table for Specific optical rotation values

| Compound    | Solvent           | Optical Rotation | Concentration  | Specific Rotation |
|-------------|-------------------|------------------|----------------|-------------------|
| Compound 1  | CHCl <sub>3</sub> | +0.002°          | +0.400 g/100ml | +5.000°           |
| PDI 2       | CHCl <sub>3</sub> | +0.011°          | +0.400 g/100ml | +27.500°          |
| PDI 3       | CHCl <sub>3</sub> | +0.010°          | +0.400 g/100ml | +25.000°          |
| PDI 3       | DMSO              | +0.002°          | +0.100 g/100ml | +20.000°          |
| PDI 3 + ATP | DMSO              | -0.008°          | +0.100 g/100ml | -80.000°          |

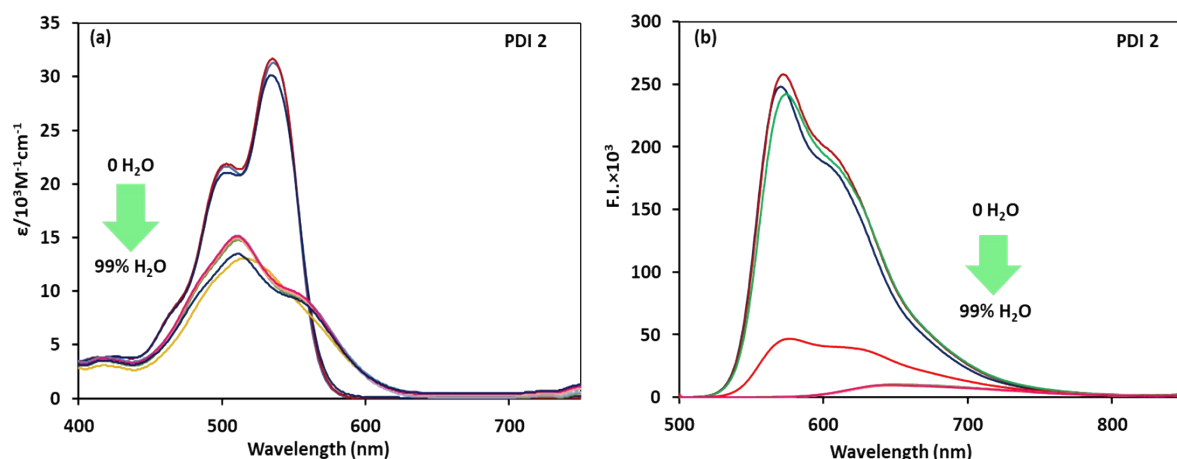

**Figure S7:** The UV–Vis (a) and fluorescence (b) spectra of **PDI 2** (10  $\mu\text{M}$ ) in different DMSO–water ratios.  $\lambda_{\text{ex}} = 490 \text{ nm}$ , slit width (ex/em) = 5/5.

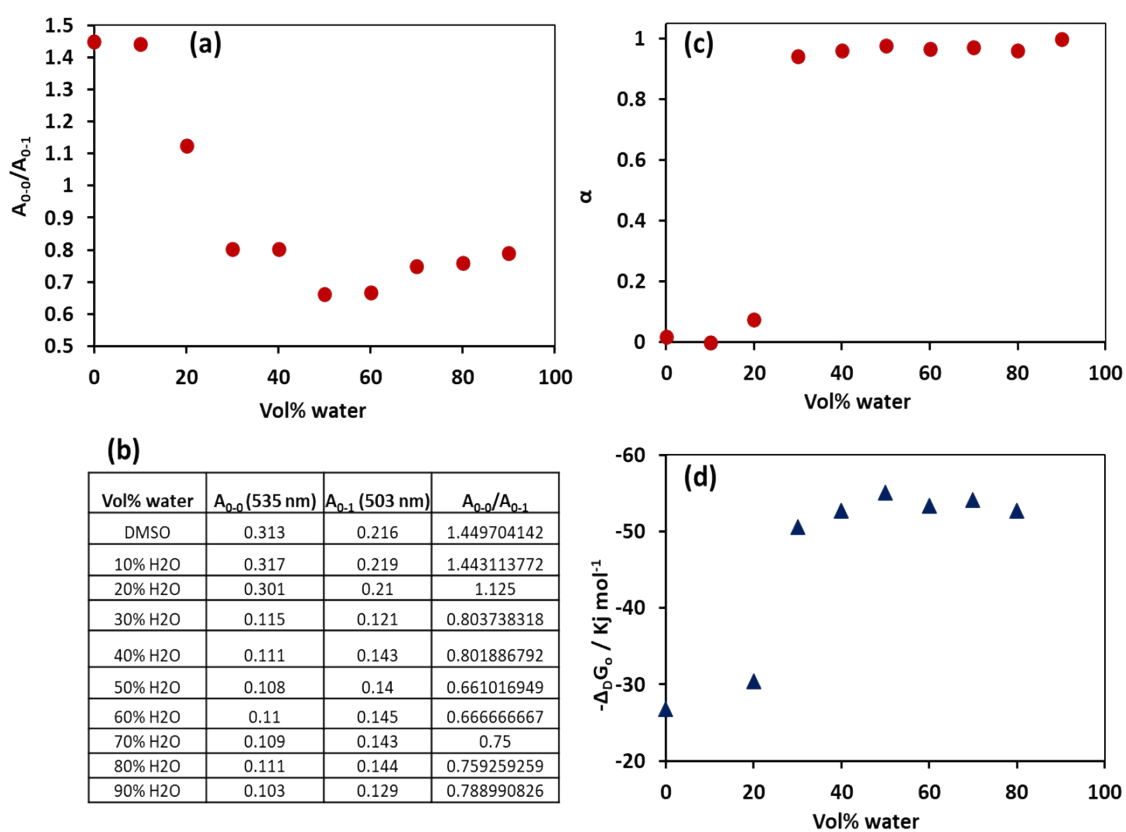

**Figure S8:** (a,b) Plot and tabulated value of Franck–Condon ( $A_{0-0}/A_{0-1}$ ) values of **PDI 2** versus H<sub>2</sub>O fraction in DMSO; (c) Plot of the degree of aggregation ( $\alpha_{\text{agg}}$ ) versus H<sub>2</sub>O fraction in DMSO and (d) plot of  $\Delta G^*$  versus H<sub>2</sub>O fraction in DMSO.

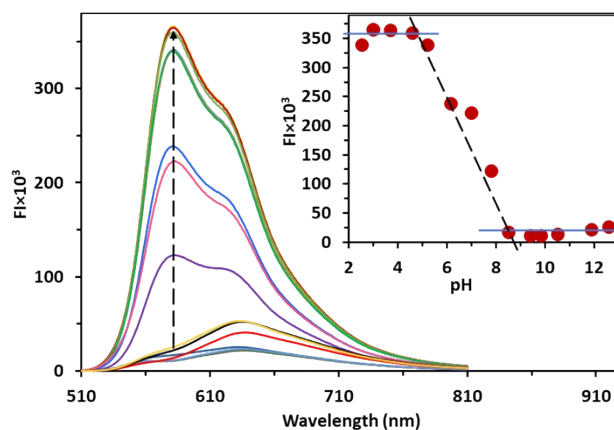

**Figure S9.** The fluorescence pH titration of PDI 3 (5  $\mu$ M) in 50% H<sub>2</sub>O-DMSO solution.

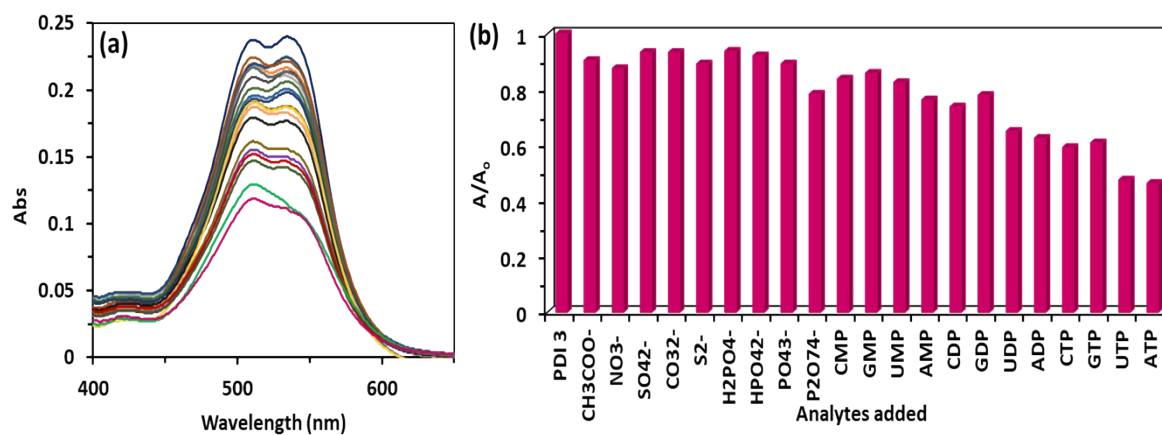

**Figure S10:** (a) UV-Vis response of PDI 3 toward various anionic analytes; (b) bar graph of  $I/I_0$  plots of absorbance and emission data showing response towards anions and NPPs.

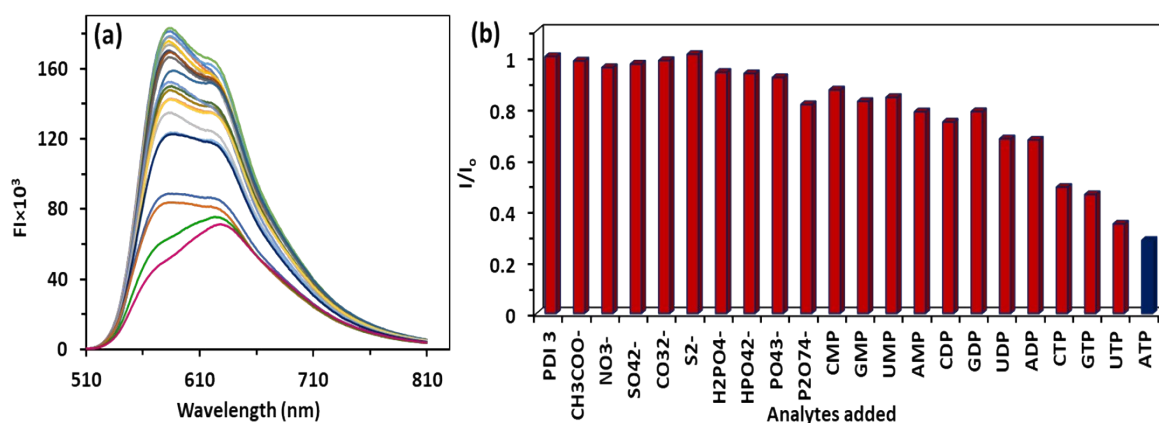

**Figure S11:** (a) Fluorescence response of PDI 3 toward various anionic analytes; (b) bar graph of  $I/I_0$  plots of absorbance and emission data showing response towards anions and NPPs. (Not complete Image).

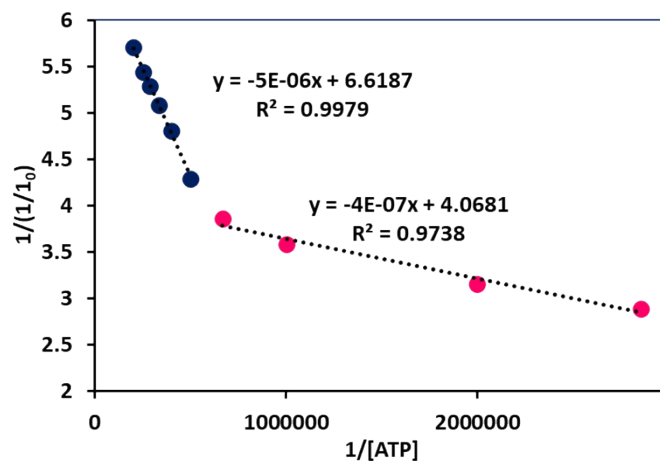

Figure S12a: B-H Plot of PDI 3 with ATP.

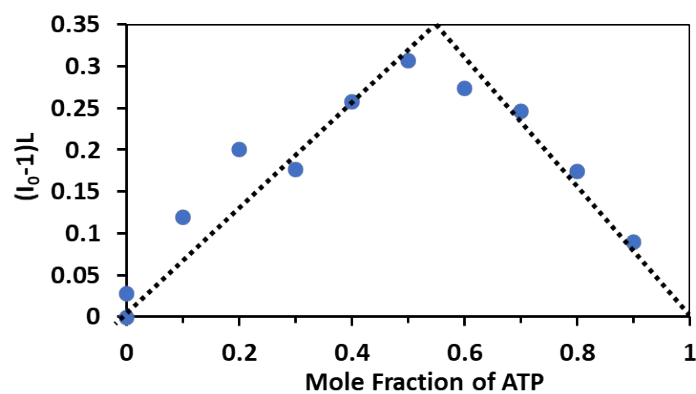

Figure S12b: Job plot of PDI 3 with ATP.

Table S2 Changes in the Franck-Codon factor ( $A_{0-0}/A_{0-1}$ ) on interaction with ATP:

| ATP Equivalents | $A_{0-1}$ (512 nm) | $A_{0-0}$ (535 nm) | $A_{0-0}/A_{0-1}$ |
|-----------------|--------------------|--------------------|-------------------|
| PDI 3           | 0.268              | 0.274              | 1.022388          |
| 0.001 ATP       | 0.254              | 0.26               | 1.023622          |
| 0.005 ATP       | 0.23               | 0.238              | 1.034783          |
| 0.01 ATP        | 0.219              | 0.227              | 1.03653           |
| 0.015 ATP       | 0.215              | 0.223              | 1.037209          |
| 0.02 ATP        | 0.209              | 0.216              | 1.033493          |
| 0.07 ATP        | 0.192              | 0.197              | 1.026042          |
| 0.1 ATP         | 0.188              | 0.193              | 1.026596          |
| 0.15 ATP        | 0.184              | 0.187              | 1.016304          |
| 0.2 ATP         | 0.178              | 0.178              | 1                 |
| 0.3 ATP         | 0.169              | 0.166              | 0.982249          |
| 0.4 ATP         | 0.167              | 0.159              | 0.952096          |
| 0.5 ATP         | 0.162              | 0.15               | 0.925926          |
| 0.8 ATP         | 0.156              | 0.142              | 0.910256          |
| 1 ATP           | 0.154              | 0.136              | 0.883117          |

|                |       |       |          |
|----------------|-------|-------|----------|
| <b>1.5 ATP</b> | 0.151 | 0.132 | 0.874172 |
| <b>2 ATP</b>   | 0.147 | 0.123 | 0.836735 |
| <b>3 ATP</b>   | 0.145 | 0.12  | 0.827586 |
| <b>4 ATP</b>   | 0.14  | 0.114 | 0.814286 |
| <b>5 ATP</b>   | 0.14  | 0.114 | 0.814286 |
| <b>6 ATP</b>   | 0.139 | 0.112 | 0.805755 |

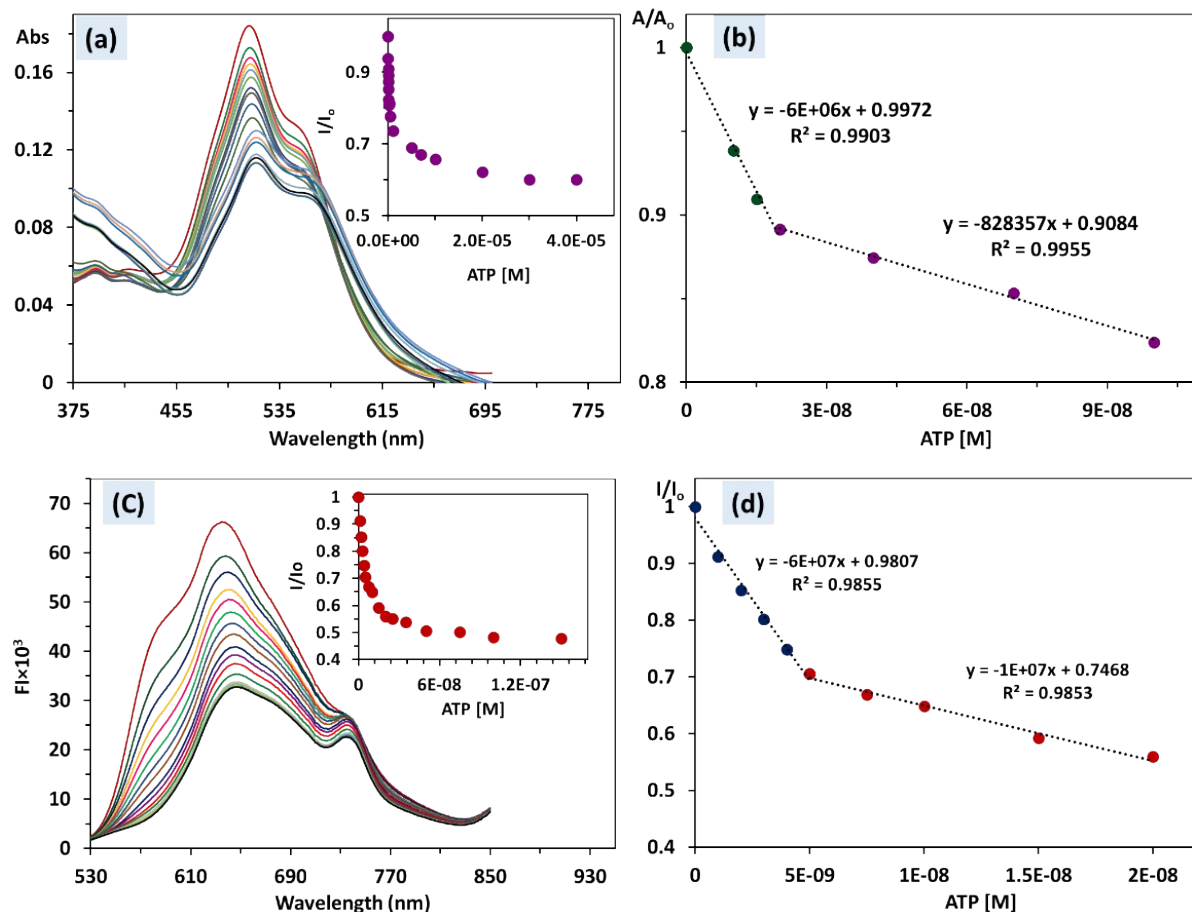

**Fig. S13** Changes in (a) absorbance (10  $\mu$ M) and (c) emission (5  $\mu$ M) spectra of PDI 3 with gradual increase of ATP concentrations in 9:1 HEPES buffer: DMSO medium; ( $\lambda_{ex}$  = 490 nm; slit width ( $E_x/E_m$ ) = 10/10 nm; [Inset of (a,c)] plot of absorbance ( $A/A_0$ ) and emission ( $I/I_0$ ) changes with change in ATP concentration, respectively; Linear correlation plot of (b)  $A/A_0$  and (d)  $I/I_0$  versus the concentration of ATP to determine the lowest limit of detection.



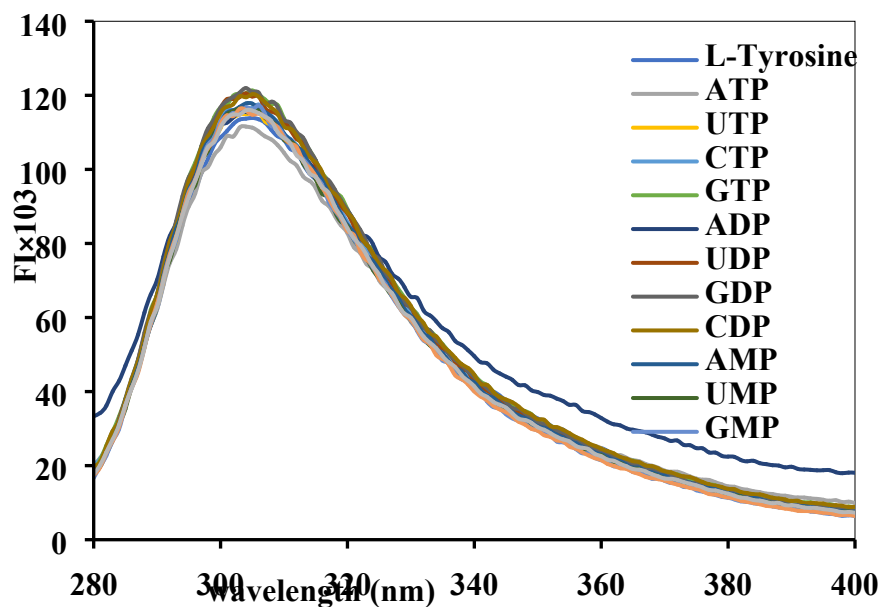

**Fig. S13a** Changes in emission (5 μM) spectra of tyrosine with gradual increase of nucleoside polyphosphates (NPPs) concentrations in 9:1 HEPES buffer: DMSO medium; ( $\lambda_{\text{ex}} = 260 \text{ nm}$ ; slit width ( $E_x/E_m$ ) = 10/10 nm.

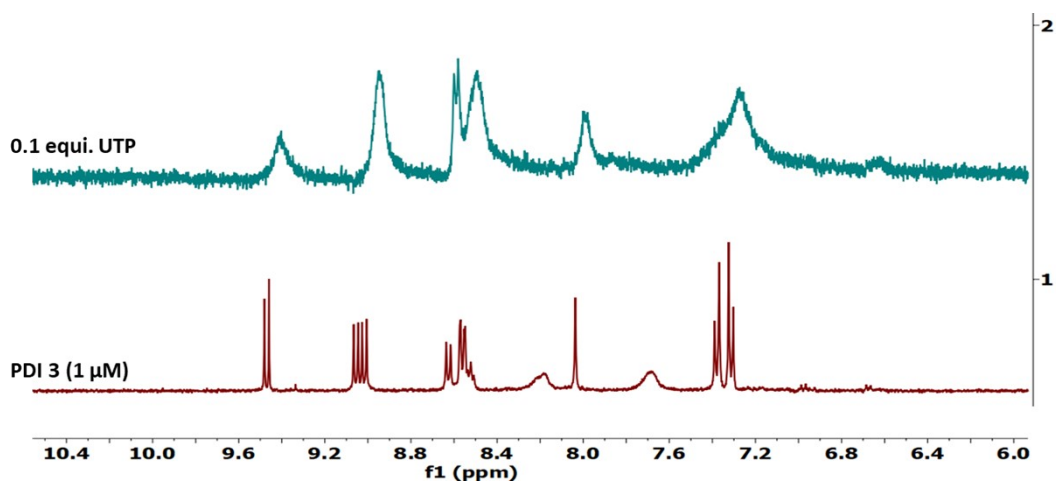

**Fig. S14** Partial <sup>1</sup>H NMR spectra (stacked) of PDI 3 (1 mM) after incremental addition of ATP in DMSO-*d*<sub>6</sub> solution.

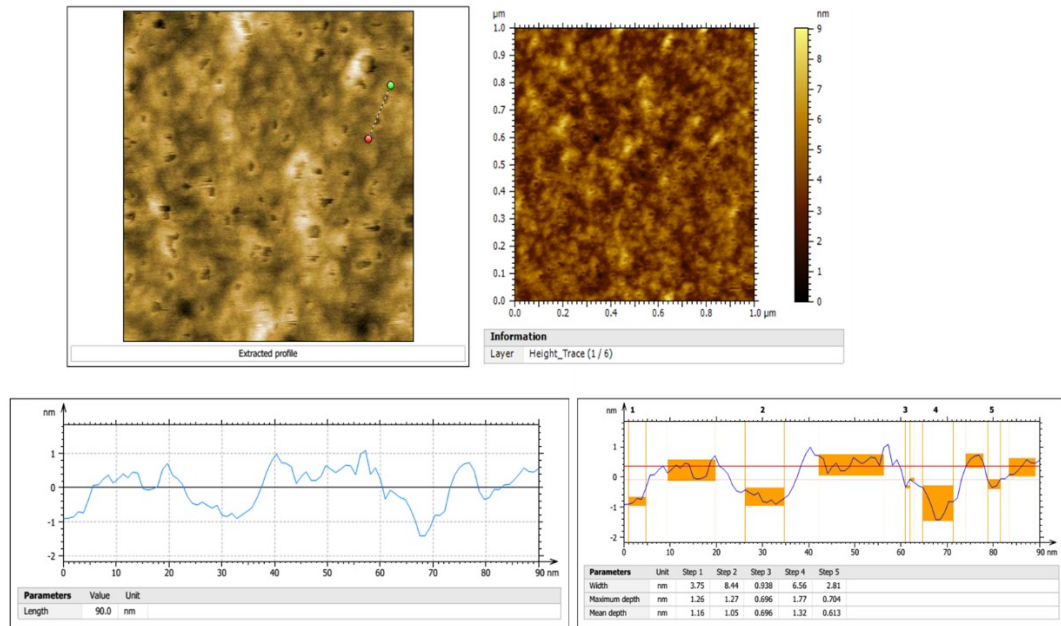

Fig. S15. AFM images of PDI 3 in 50% H<sub>2</sub>O-DMSO solution.

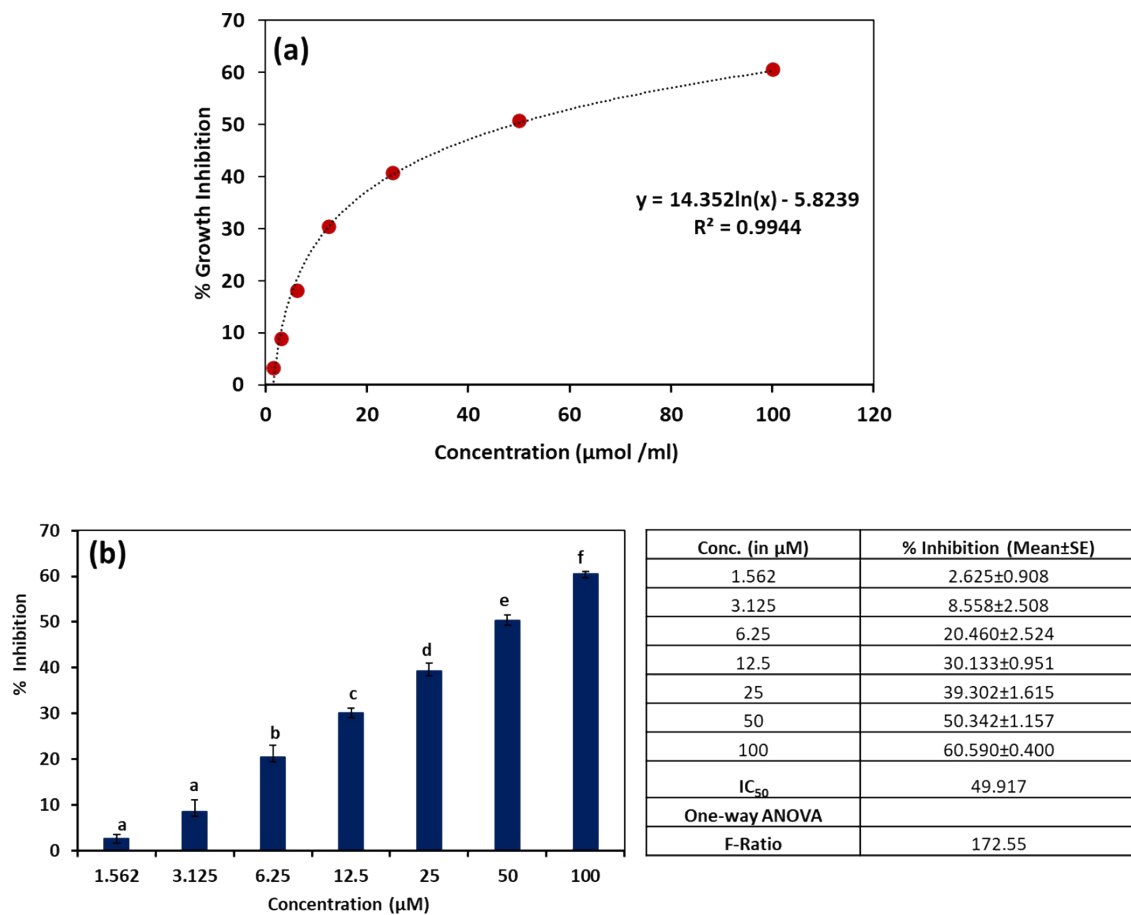

Fig. S16 MTT assay to check the cytotoxicity of PDI 3 with statistical distribution.

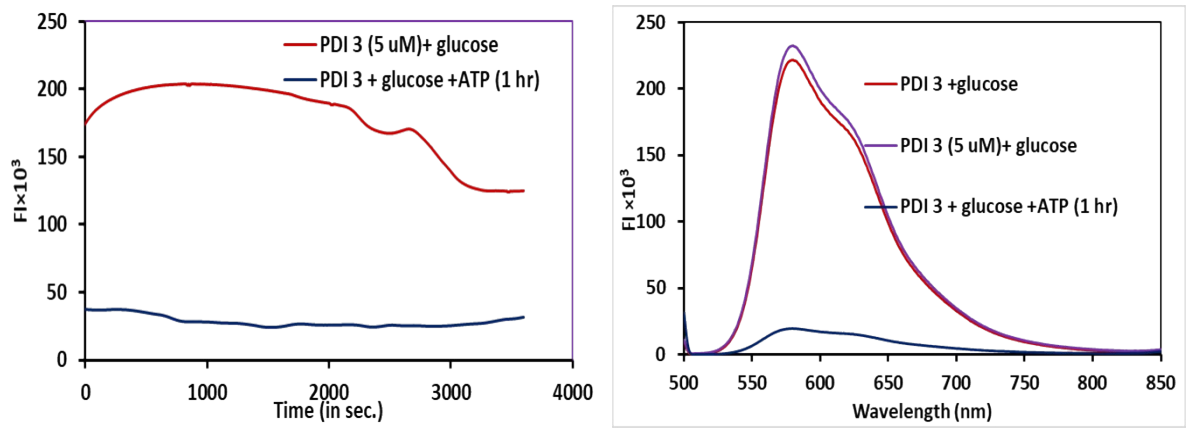

**Fig. S17:** Fluorescence spectrum of PDI 3+ATP after regular interval of time.
